# Supplementary material for: Convenient hydrogenation of furfural to furfuryl alcohol in metal-catalyzed and organo-catalyzed environments
Source: Royal Society of Chemistry journal article supplement (doi:10.1039/d3su00056g), 2023-01-01
Supplement: d3su00056g1.pdf [file d3su00056g1.pdf]

## SUPPLEMENTARY INFORMATION (SI)

### Convenient hydrogenation of furfural to furfuryl alcohol in metal-catalyzed and organo-catalyzed environments

Asanda C. Matsheku,<sup>1</sup> Munaka Christopher Maumela<sup>2</sup> and Banothile C.E. Makhubela<sup>1,\*</sup>

<sup>1</sup> Department of Chemical Sciences, Faculty of Science, University of Johannesburg, Auckland Park, Kingsway Campus, 2006. Email: [ac.matsheku@gmail.com](mailto:ac.matsheku@gmail.com)

<sup>2</sup> South Africa. Sasol (Pty) Ltd, Research and Technology (R & T), 1 Klasie Havenga Rd, Sasolburg 1947, South Africa. E-mail: [chris.maumela@sasol.com](mailto:chris.maumela@sasol.com)

\* Correspondence: [bmakhubela@uj.ac.za](mailto:bmakhubela@uj.ac.za); Tel.: +27-11-559-3782

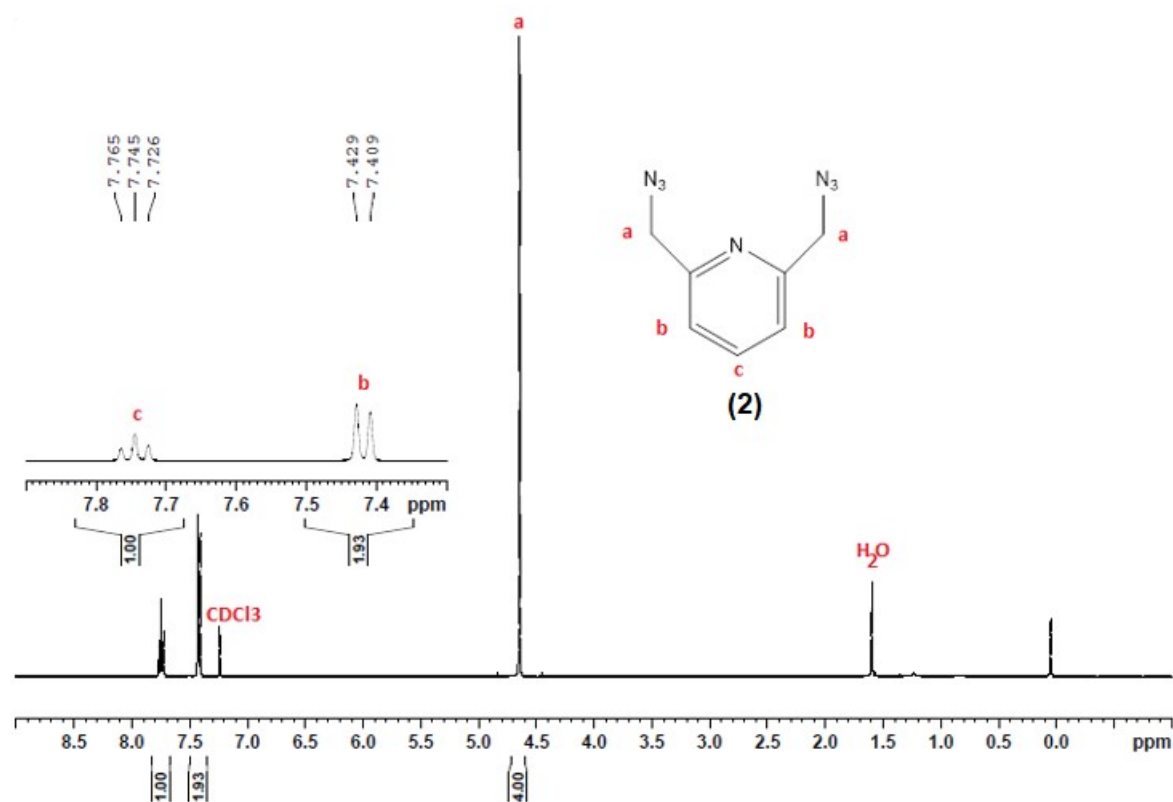

SI-Figure 1: The <sup>1</sup>H NMR of (2) was recorded in CDCl<sub>3</sub> at 25 °C.

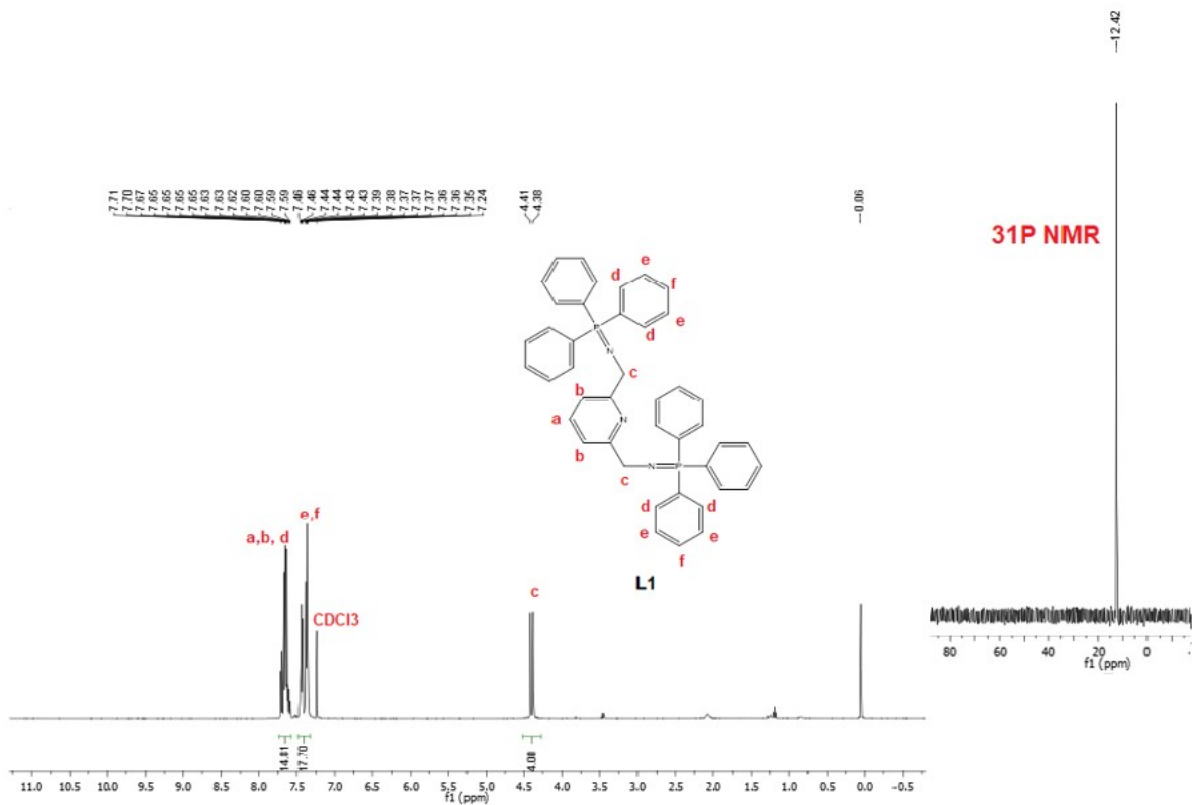

SI-Figure 2: The <sup>1</sup>H NMR and <sup>31</sup>P NMR for **L1** recorded in CDCl<sub>3</sub> at 25 °C.

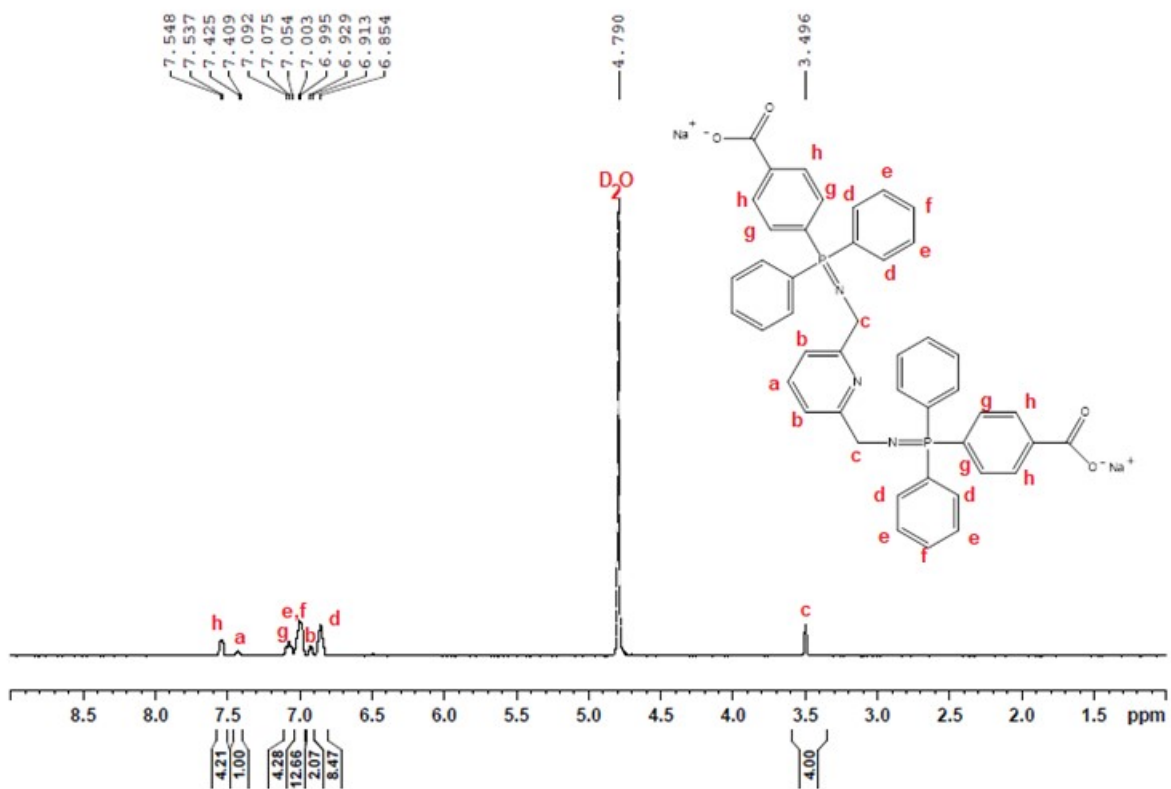

SI-Figure 3: The  $^1\text{H}$  NMR of L2 recorded in  $\text{D}_2\text{O}$  and NaOD at 25  $^\circ\text{C}$ .

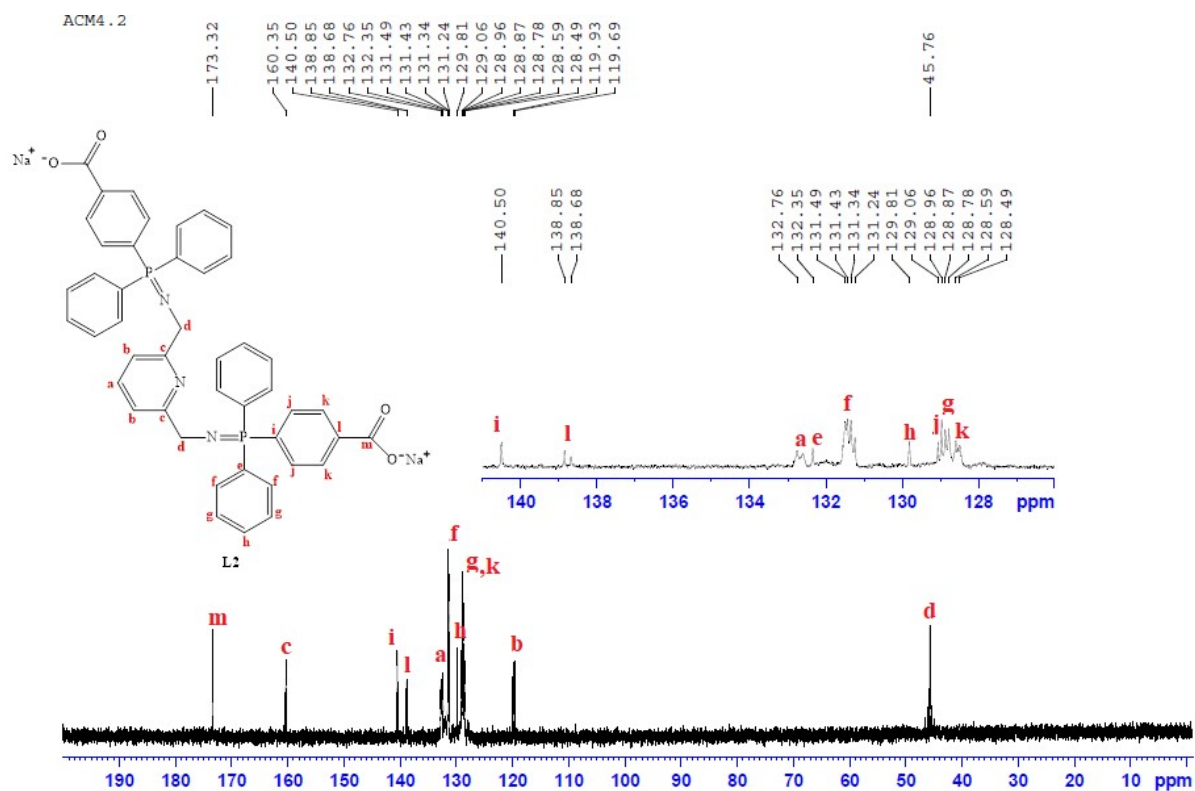

SI-Figure 4: The  $^{13}\text{C}$  NMR of L2 recorded in  $\text{D}_2\text{O}$  and NaOD at 25  $^\circ\text{C}$ .

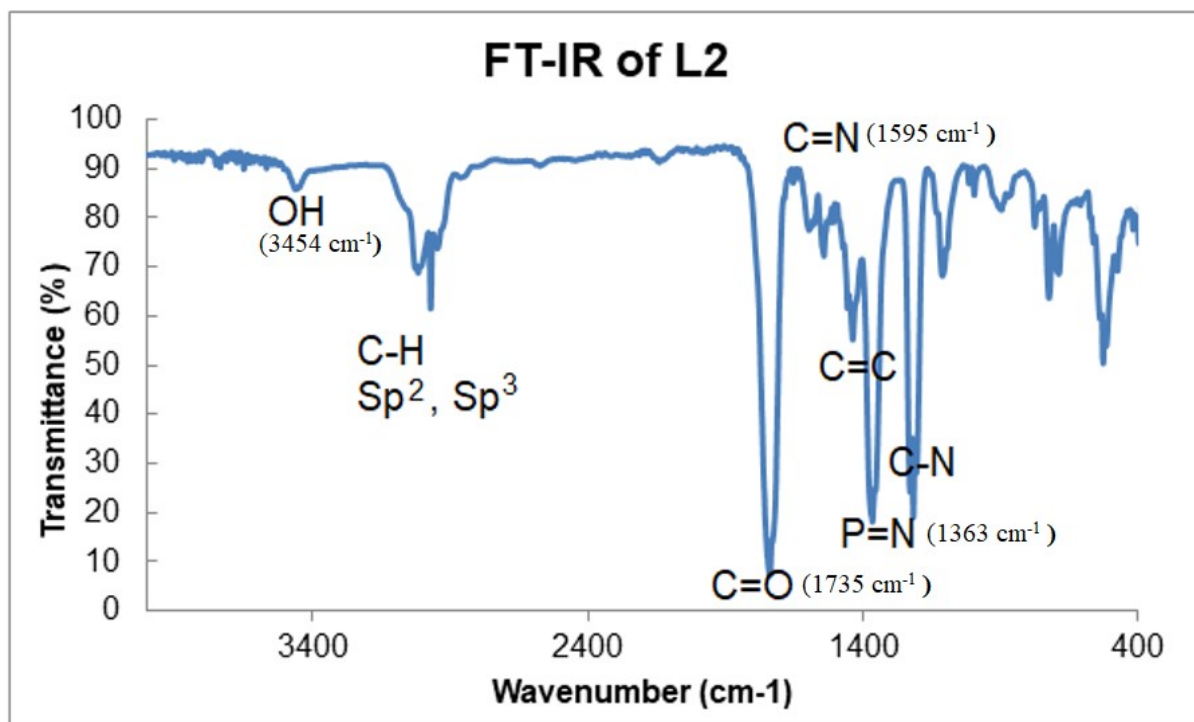

SI-Figure 5: The FT-IR spectroscopy of L2 recorded.

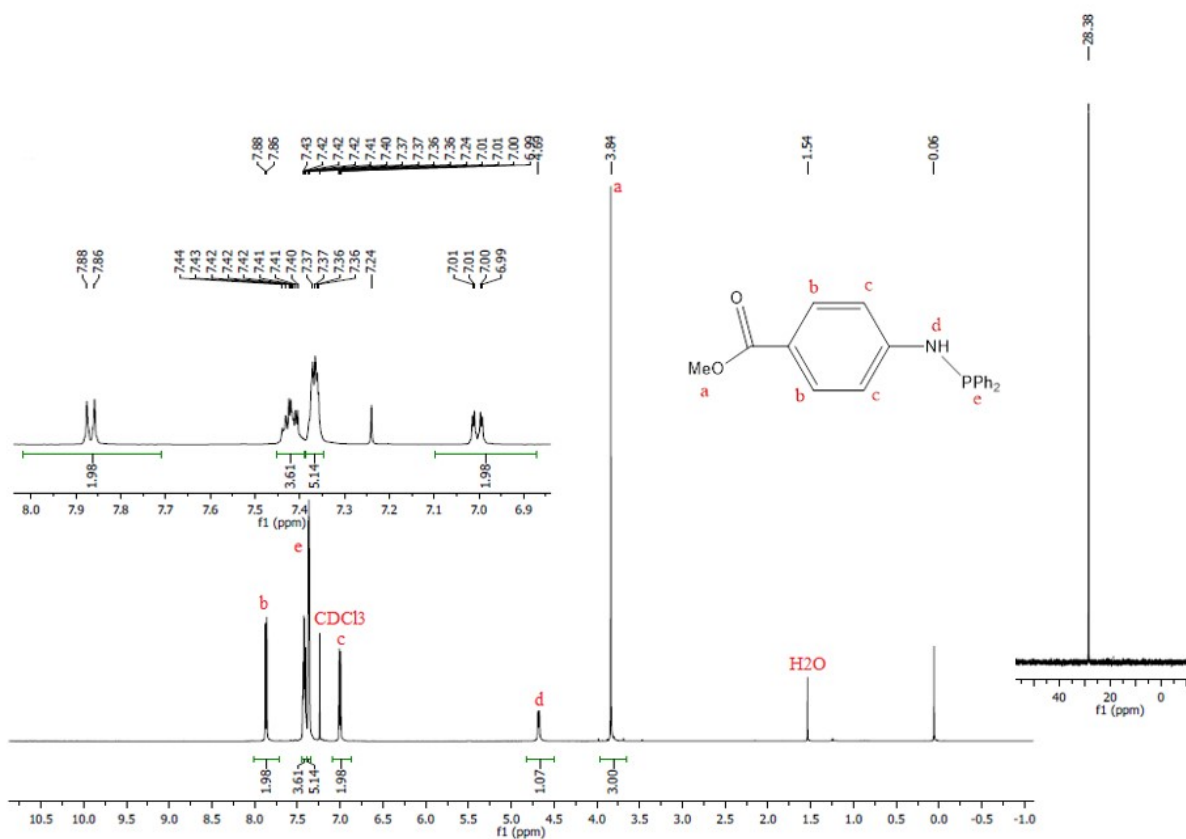

SI-Figure 6, The <sup>1</sup>H NMR and <sup>31</sup>P NMR for (4) were recorded in CDCl<sub>3</sub> at 25 °C.

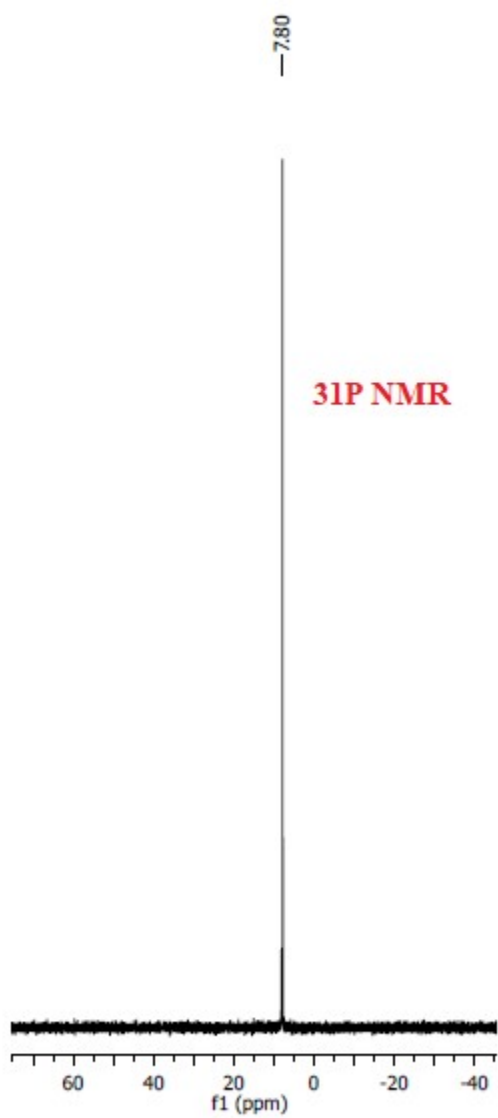

**SI-Figure 7.** The  $^{31}\text{P}$  NMR of **L3** was recorded in  $\text{CDCl}_3$  at 25 °C.

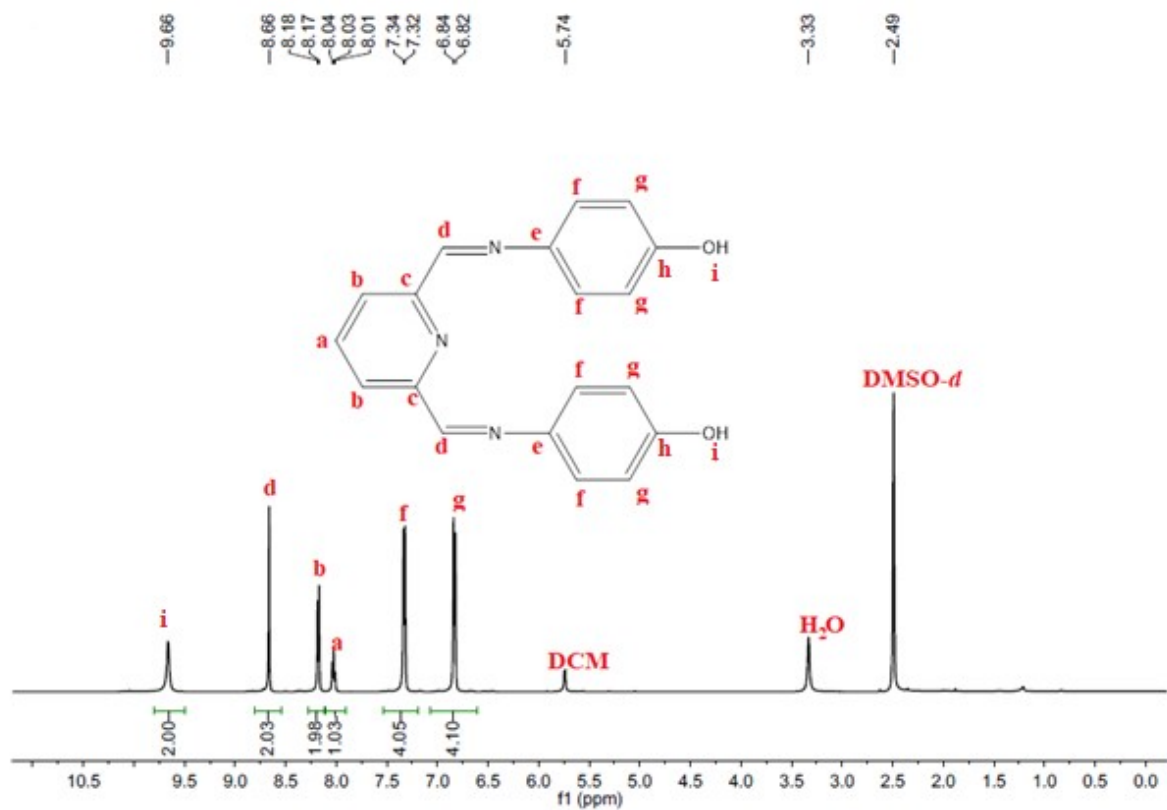

SI-Figure 8: The <sup>1</sup>H NMR of L4 recorded in DMSO-*d*<sub>6</sub> at 25 °C.

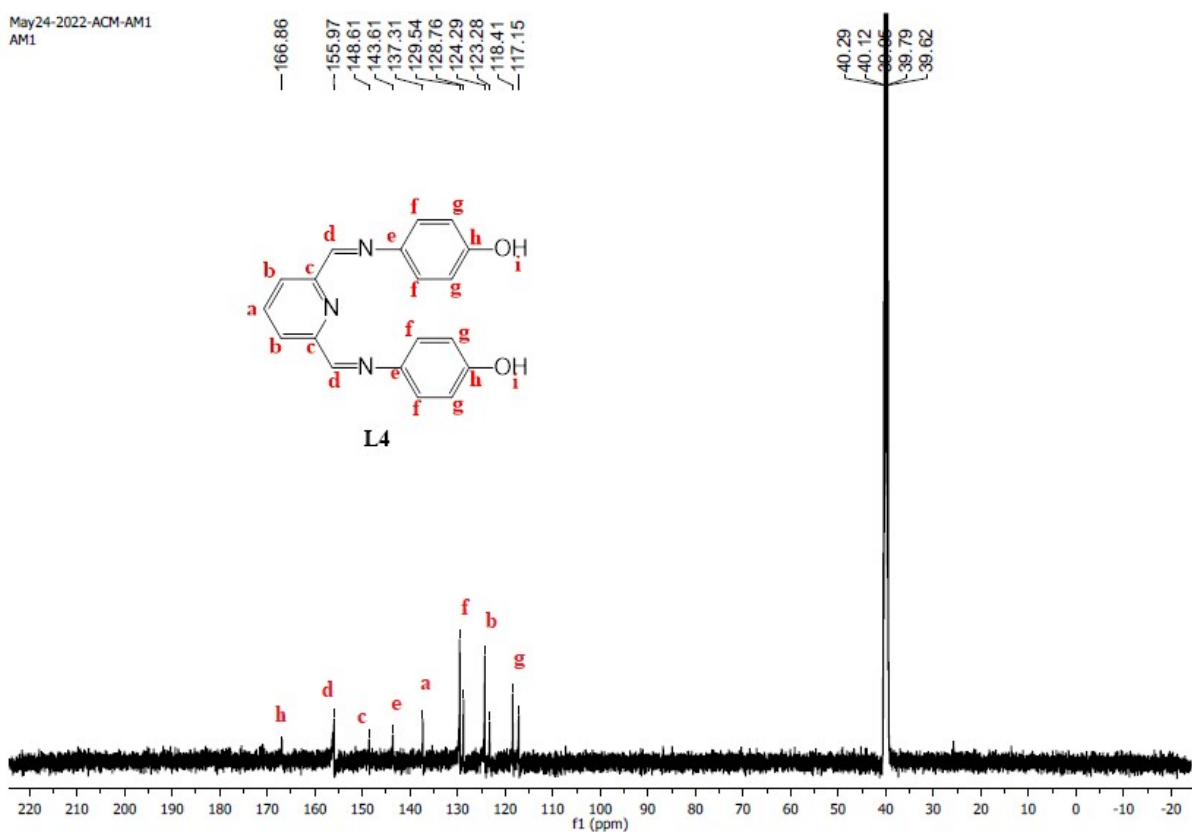

SI-Figure 9: The  $^{13}\text{C}$  NMR of L4 recorded in  $\text{DMSO-}d_6$  at 25 °C.

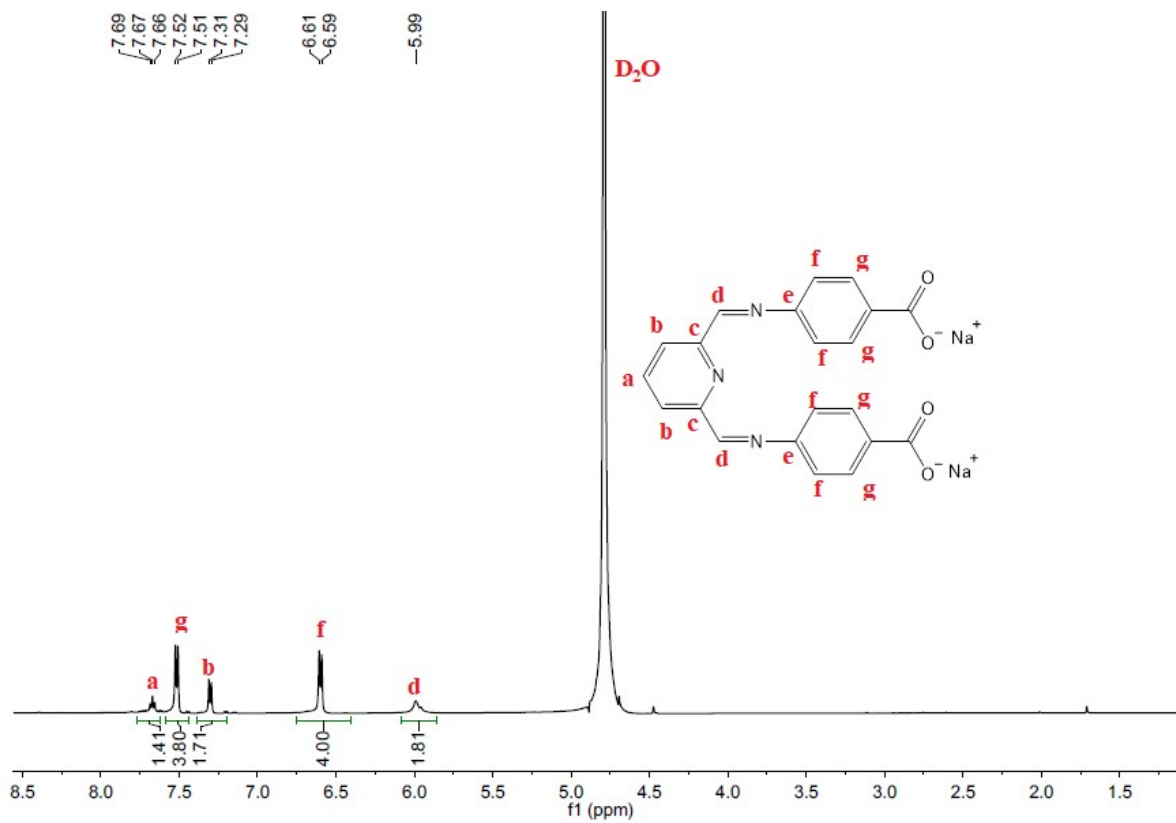

SI-Figure 10: The  $^1\text{H}$  NMR of L5 recorded in  $\text{D}_2\text{O}$  and  $\text{NaOD}$  at 25 °C.

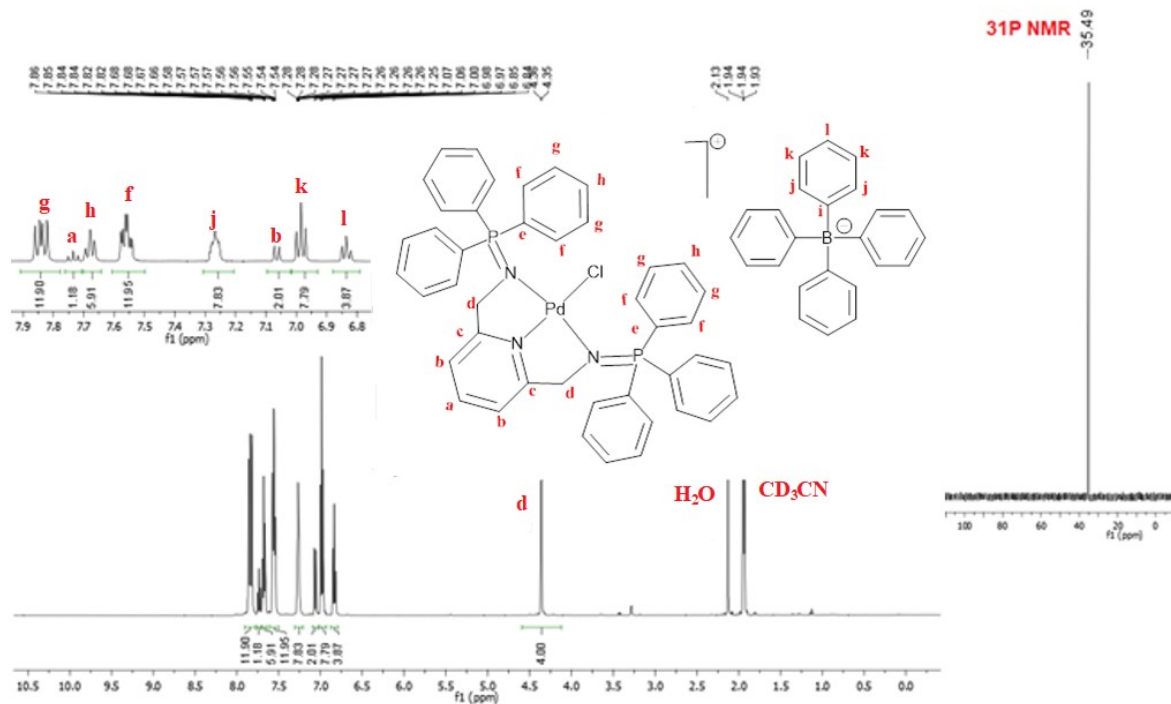

SI-Figure 11: The <sup>1</sup>H NMR and the <sup>31</sup>P NMR of C1 were recorded in CD<sub>3</sub>CN at 25 °C.

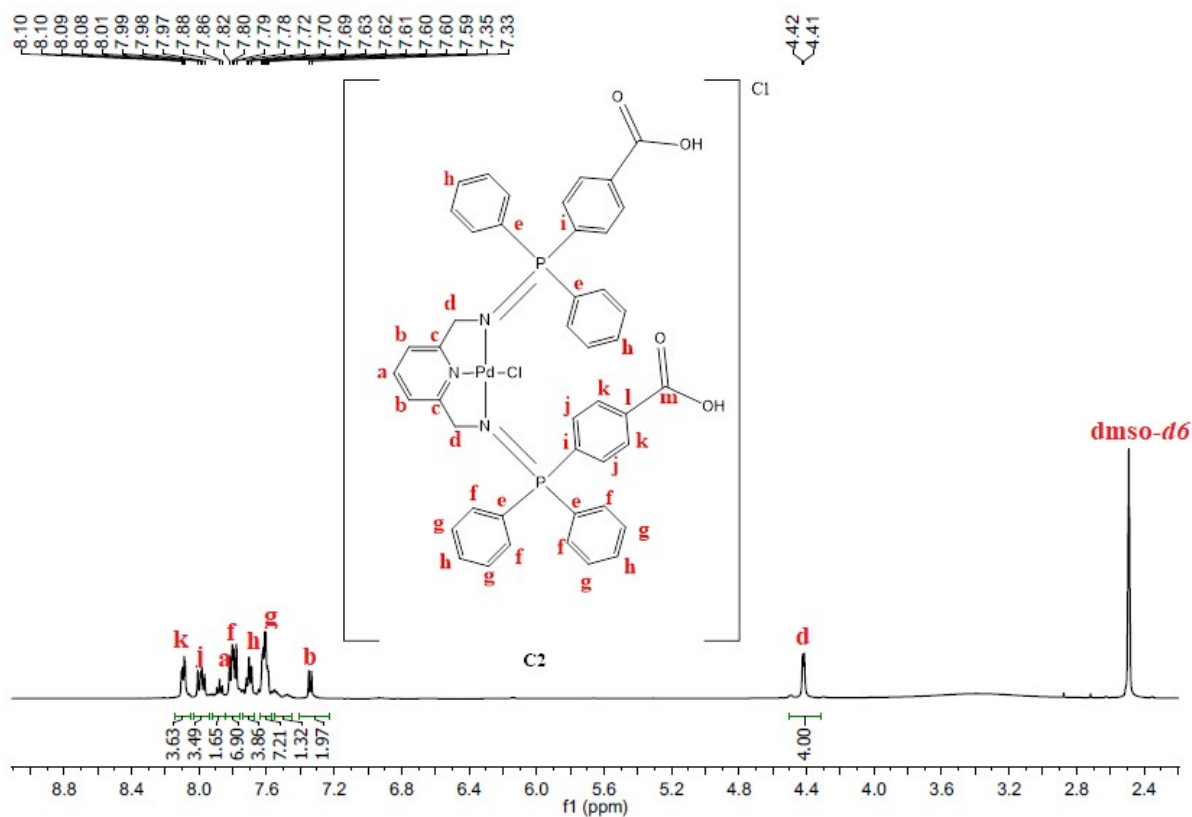

SI-Figure 12a: The <sup>1</sup>H NMR of C2 recorded in DMSO-*d*<sub>6</sub> at 25 °C.



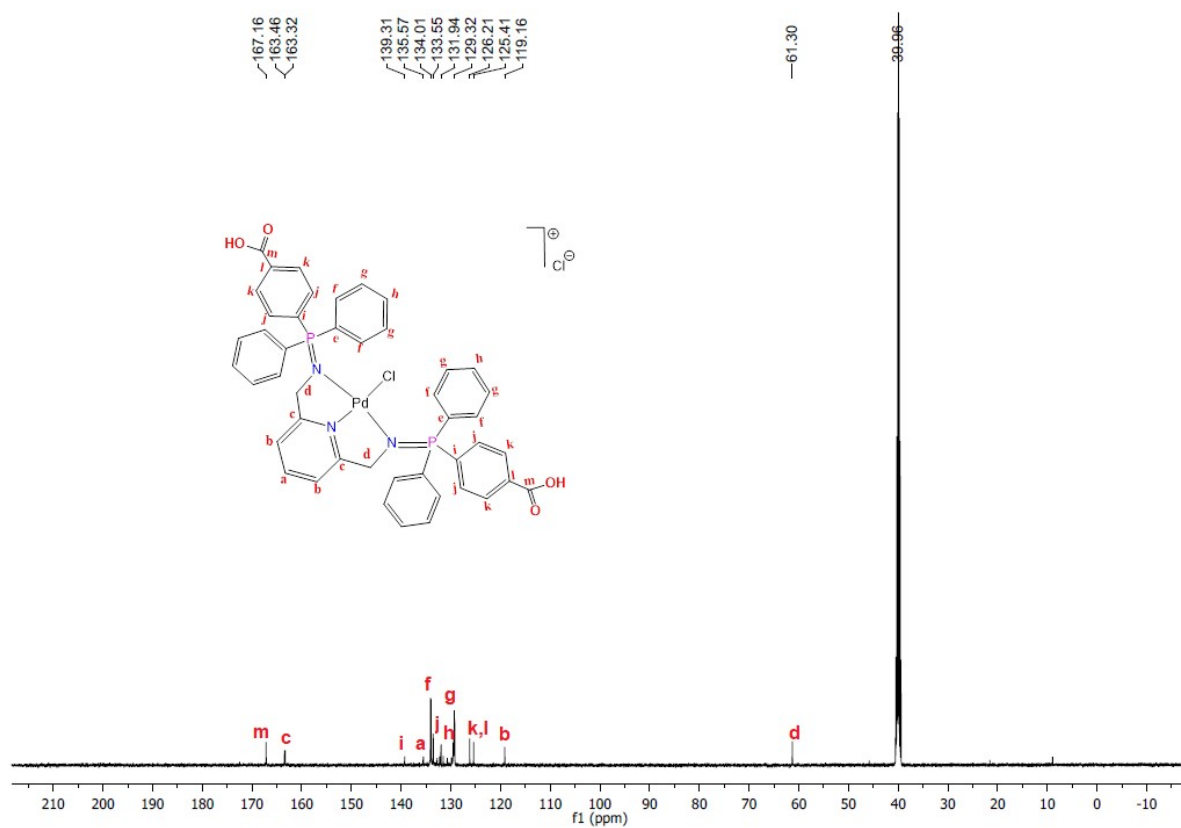

SI-Figure 12b: The  $^{13}\text{C}\{\text{H}\}$  NMR of C2 recorded in  $\text{DMSO-}d_6$  at  $25\text{ }^\circ\text{C}$ .

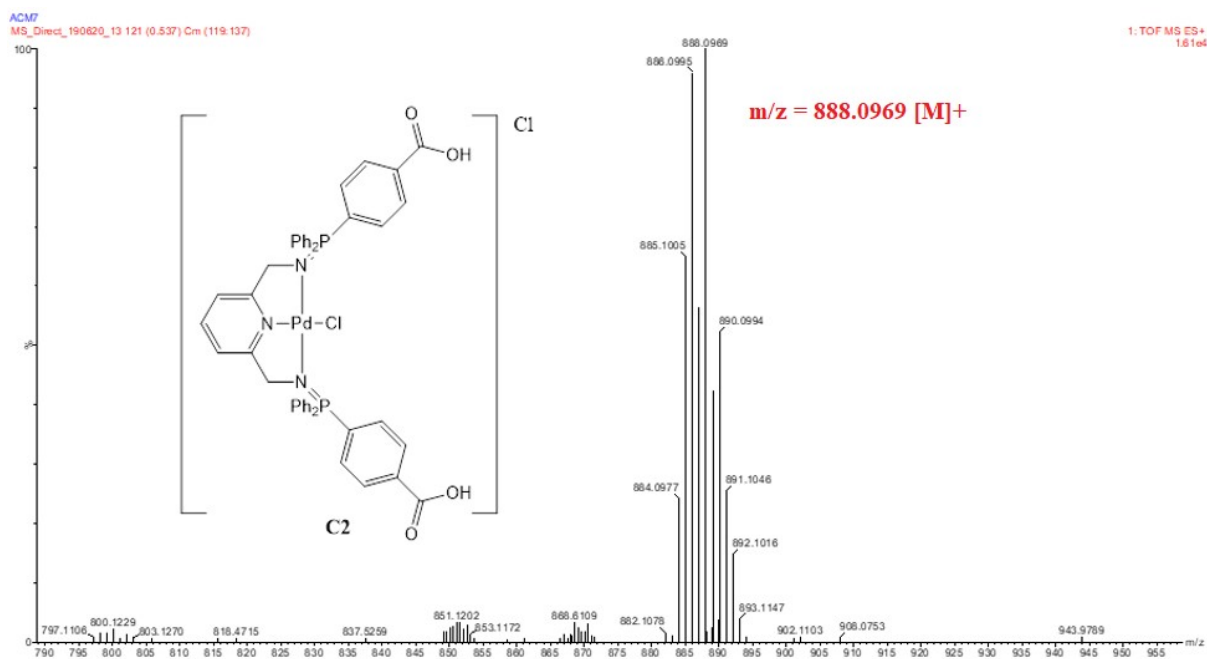

SI-Figure 13. HR-ESI-MS spectrum of C2.

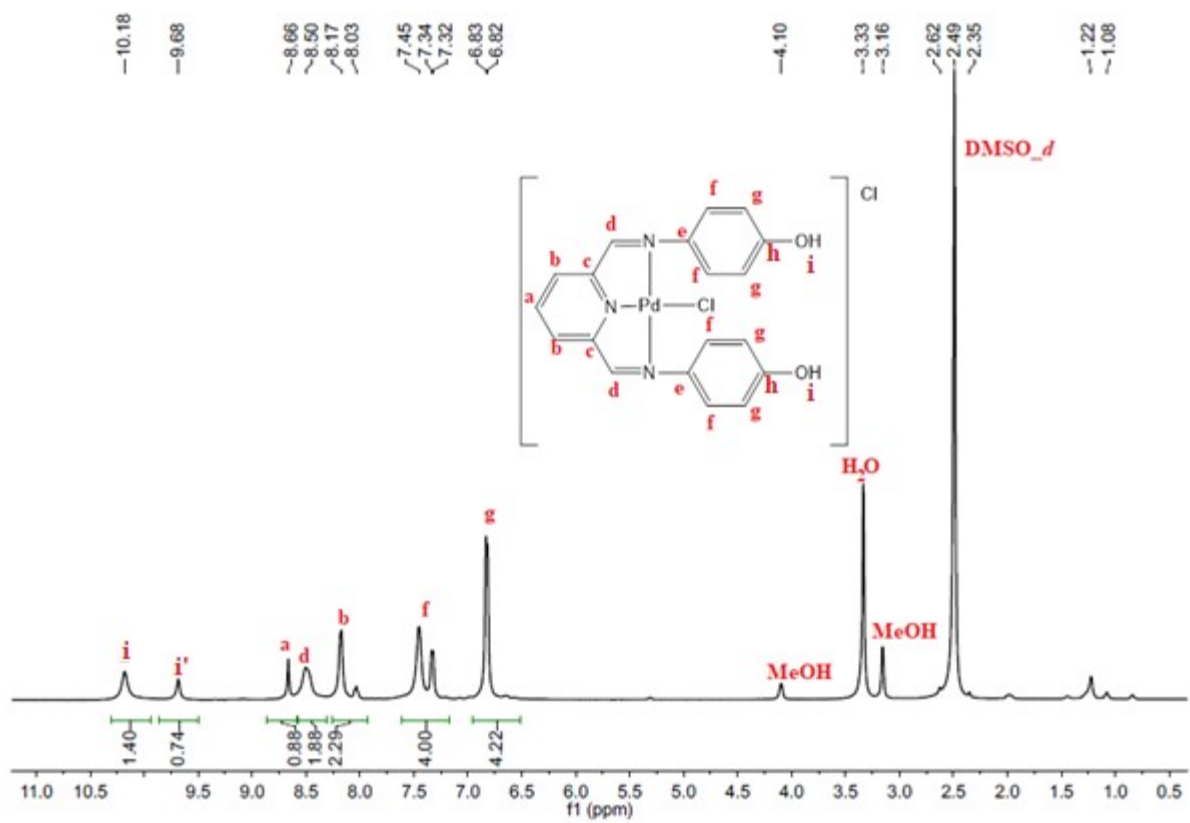

SI-Figure 14: The  $^1\text{H}$  NMR of C4 recorded in DMSO- $d_6$  at 25 °C.

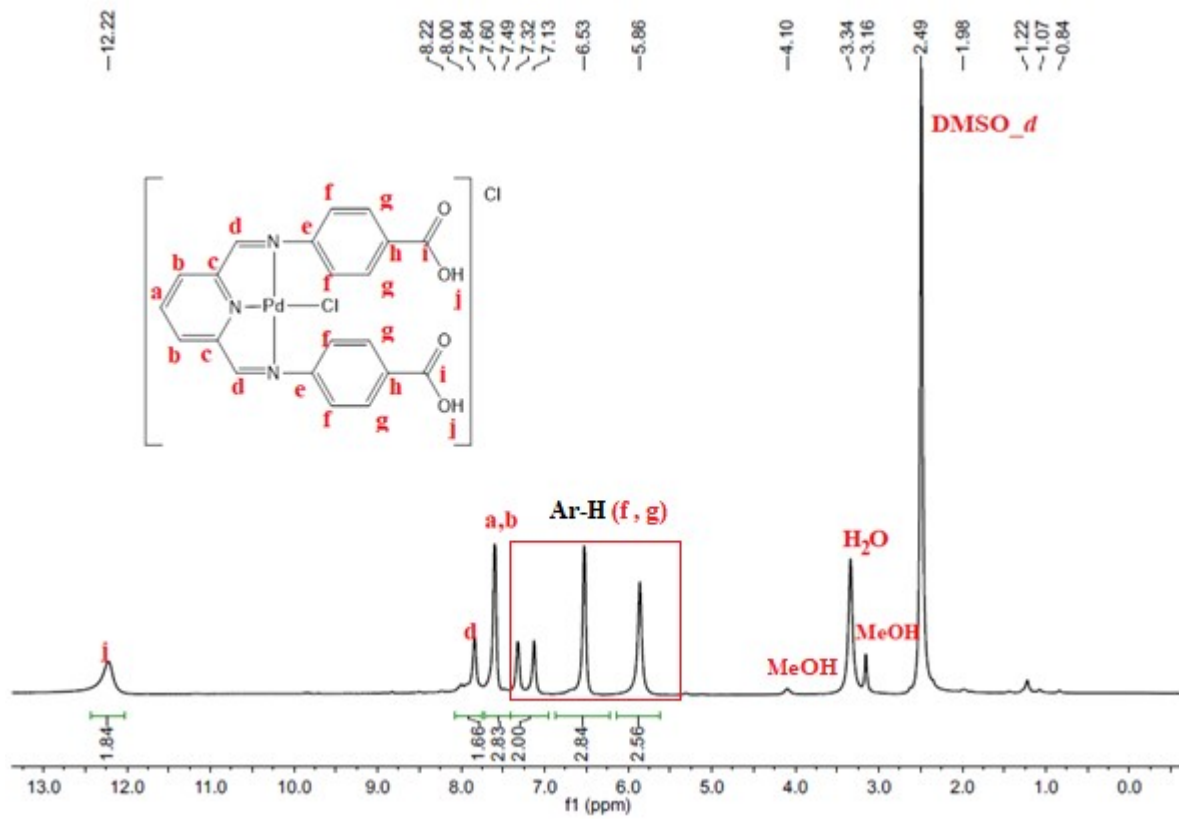

SI-Figure 15: The <sup>1</sup>H NMR of C5 recorded in DMSO-*d*<sub>6</sub> at 25 °C.

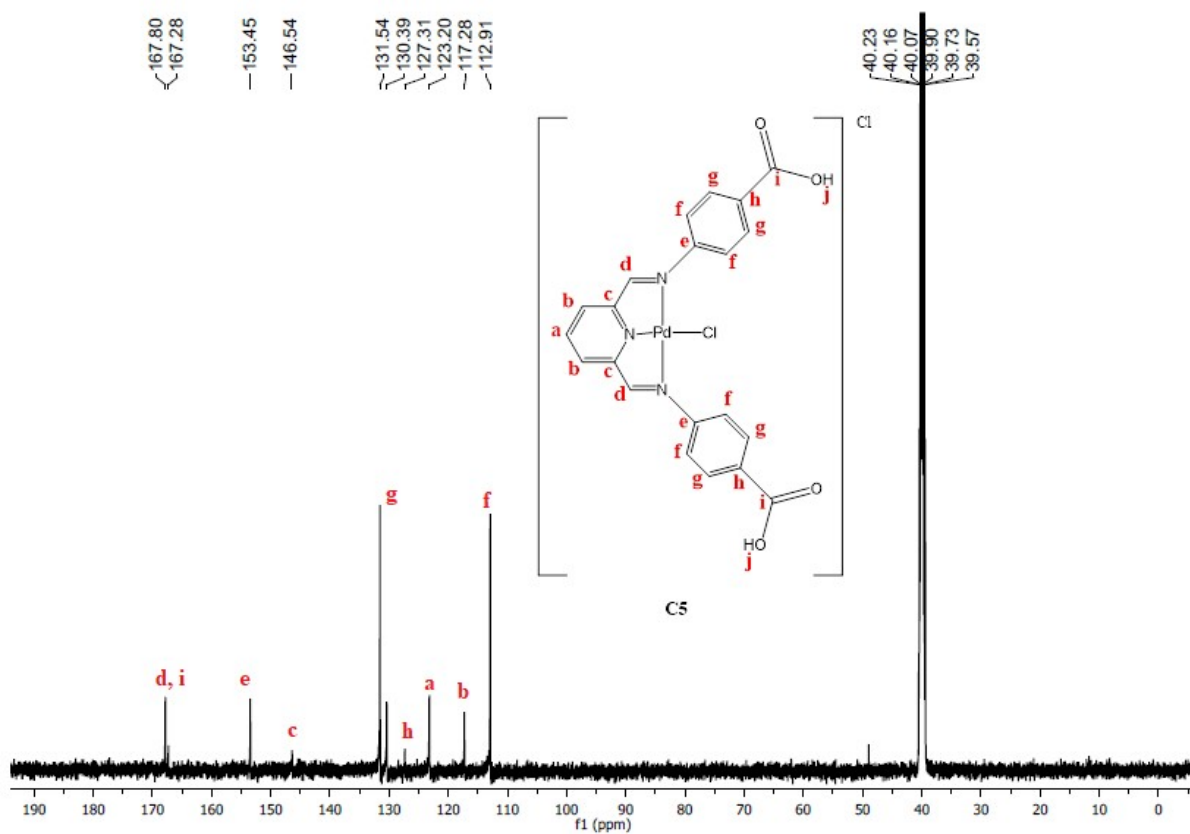

SI-Figure 16: The  $^{13}\text{C}$  NMR of **C5** recorded in  $\text{DMSO-}d_6$  at 25 °C.

**SI-Table 1 Crystal data and structure refinement for C1**

|                                             |                                                                     |
|---------------------------------------------|---------------------------------------------------------------------|
| Empirical formula                           | C <sub>67</sub> H <sub>57</sub> BClN <sub>3</sub> P <sub>2</sub> Pd |
| Formula weight                              | 1117.28 g/mol                                                       |
| Temperature/K                               | 100                                                                 |
| Crystal system                              | monoclinic                                                          |
| Space group                                 | P2 <sub>1</sub> /c                                                  |
| a/Å                                         | 12.9953(5)                                                          |
| b/Å                                         | 16.9291(8)                                                          |
| c/Å                                         | 27.3479(12)                                                         |
| α/°                                         | 90                                                                  |
| β/°                                         | 103.019(1)                                                          |
| γ/°                                         | 90                                                                  |
| Volume/Å <sup>3</sup>                       | 5861.9(4)                                                           |
| Z                                           | 96                                                                  |
| ρ <sub>calc</sub> /g/cm <sup>3</sup>        | 1.2965                                                              |
| μ/mm <sup>-1</sup>                          | 0.550                                                               |
| F(000)                                      | 2243.4                                                              |
| Crystal size/mm <sup>3</sup>                | 0.3 × 0.2 × 0.2                                                     |
| Radiation                                   | Mo Kα (λ = 0.71073)                                                 |
| 2θ range for data collection/°              | 4.02 to 52.84                                                       |
| Index ranges                                | -15 ≤ h ≤ 16, -21 ≤ k ≤ 21, -34 ≤ l ≤ 34                            |
| Reflections collected                       | 152571                                                              |
| Independent reflections                     | 12018 [R <sub>int</sub> = 0.0670, R <sub>sigma</sub> = 0.0275]      |
| Data/restraints/parameters                  | 12018/0/702                                                         |
| Goodness-of-fit on F <sup>2</sup>           | 1.820                                                               |
| Final R indexes [I ≥ 2σ (I)]                | R <sub>1</sub> = 0.0702, wR <sub>2</sub> = 0.2216                   |
| Final R indexes [all data]                  | R <sub>1</sub> = 0.0824, wR <sub>2</sub> = 0.2327                   |
| Largest diff. peak/hole / e Å <sup>-3</sup> | 2.72/-2.90                                                          |

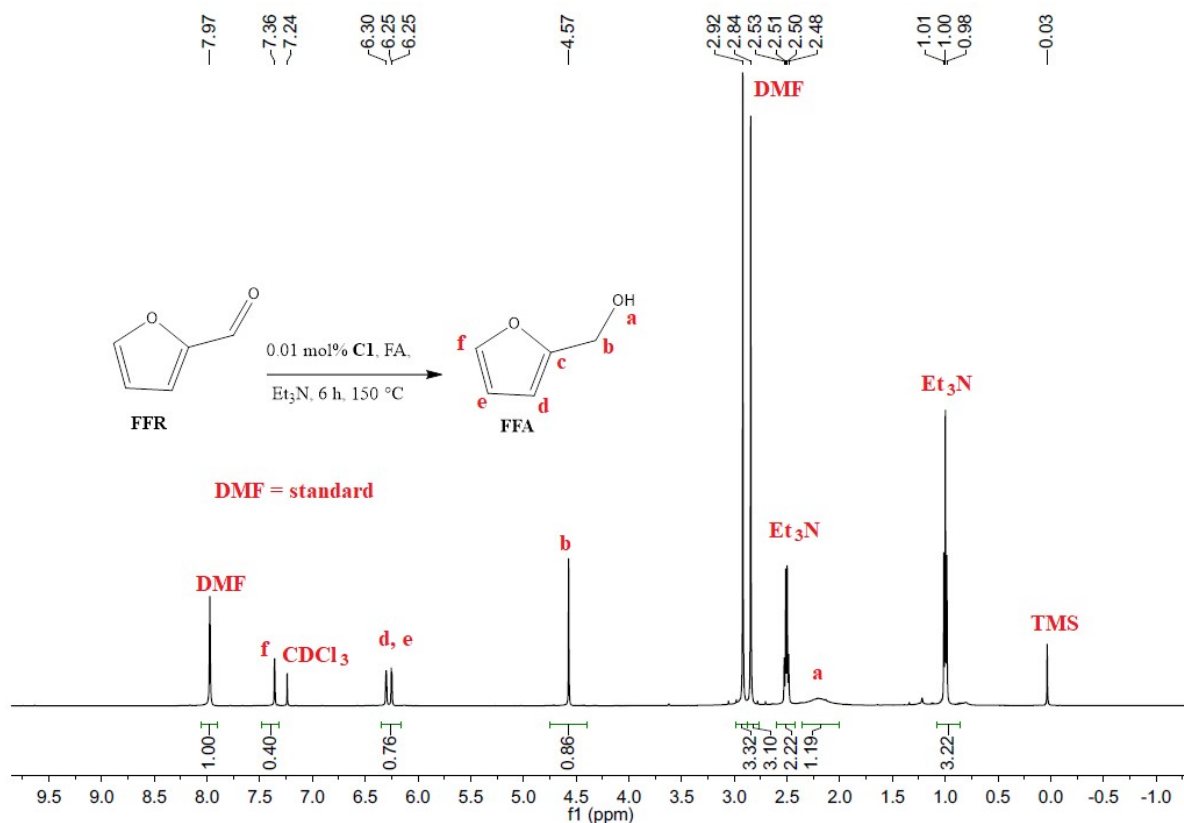

**SI-Figure 17.** The <sup>1</sup>H NMR of the hydrogenation of FFR to FFA using C1 after the reaction was recorded in CDCl<sub>3</sub> at 25 °C.

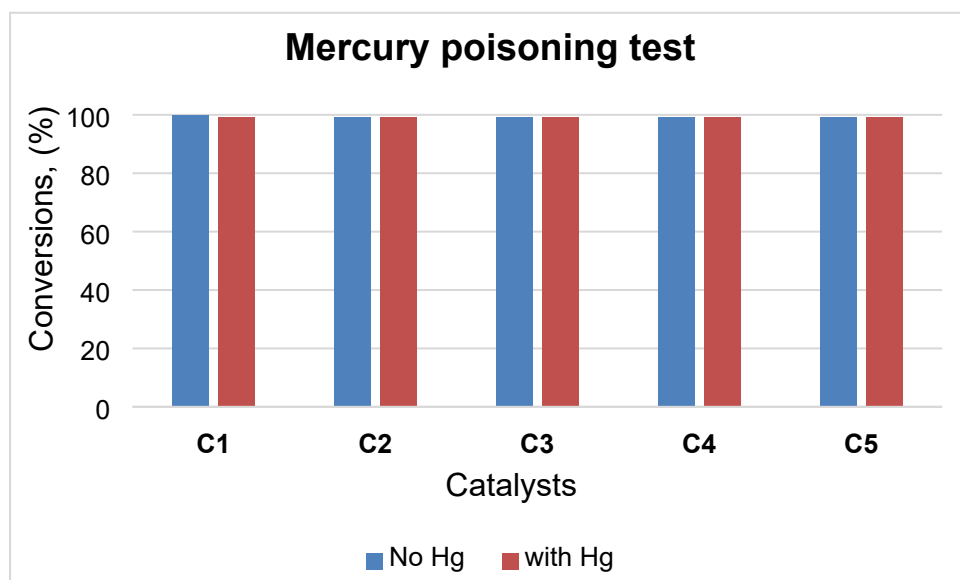

**SI-Figure 18. Reaction conditions:** Reactions were carried out using catalysts C1 – C5, in formic acid (5 mmol) with 5 mmol of FFR and 5 mmol of amine. The reaction was allowed to run for 6 hours at 150 °C in the presence of 5 mg of mercury (Hg). Thereafter, DMF was used as an internal standard, mmol product was determined by <sup>1</sup>H NMR spectroscopy.

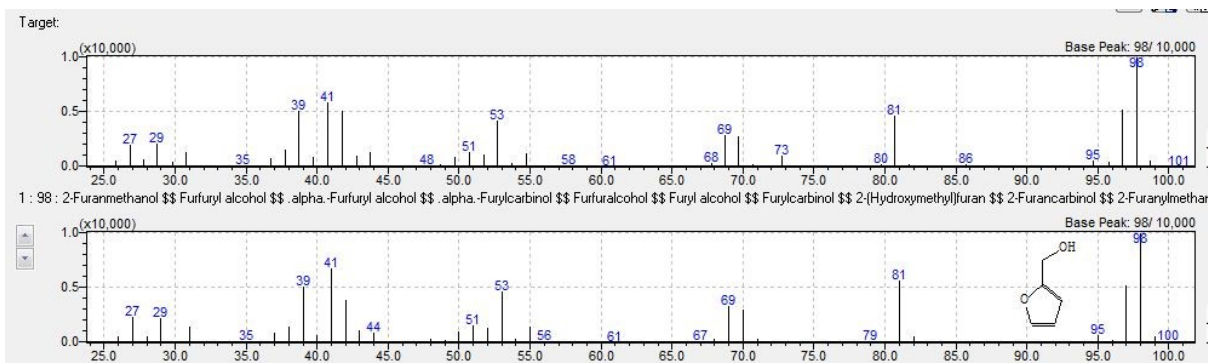

SI-Figure 19. GC-MS of furfuryl alcohol as a product of the organo-catalyzed furfural.

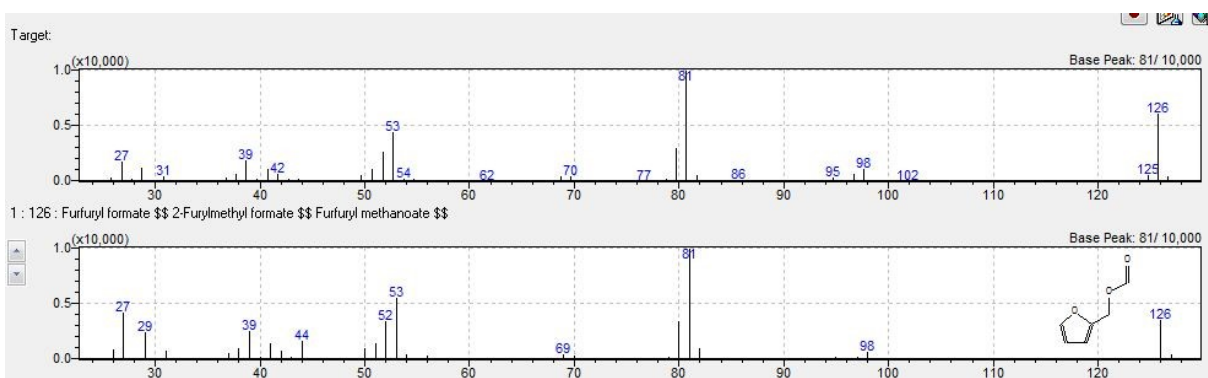

SI-Figure 20. GC-MS of furfuryl formate as a product of the organo-catalyzed furfural.

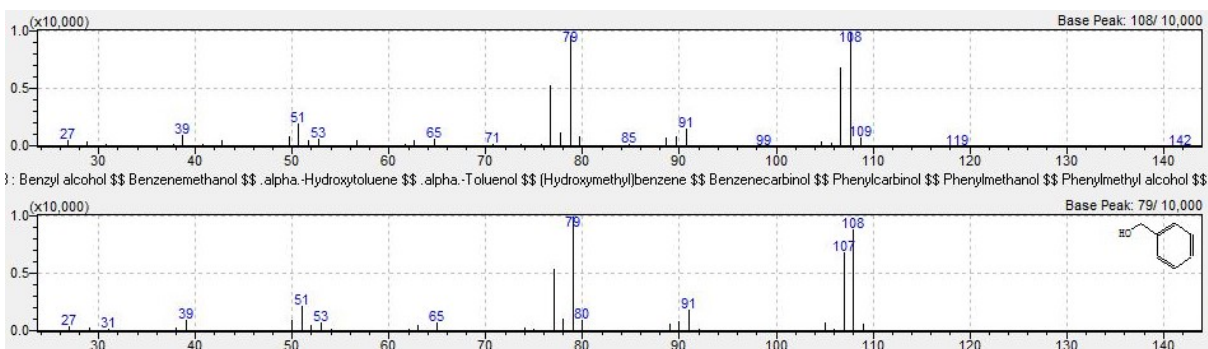

SI-Figure 21. GC-MS of benzyl alcohol as a product of the organo-catalyzed benzaldehyde.

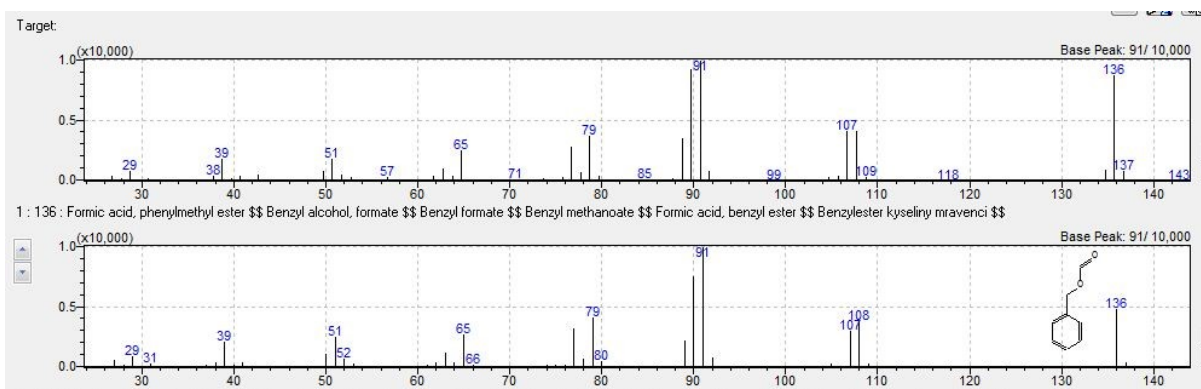

SI-Figure 22. GC-MS of benzyl formate as a product of the organo-catalyzed benzaldehyde.

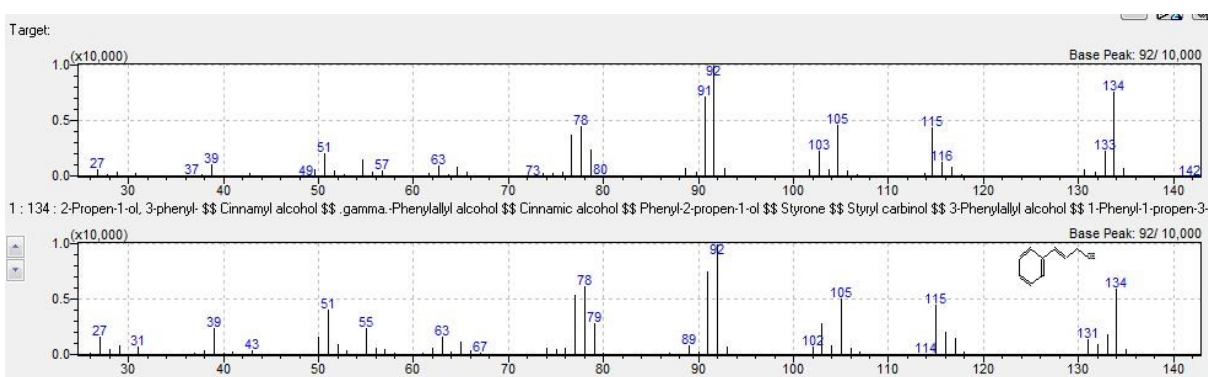

SI-Figure 23. GC-MS of cinnamyl alcohol as a product of the organo-catalyzed cinnamaldehyde.

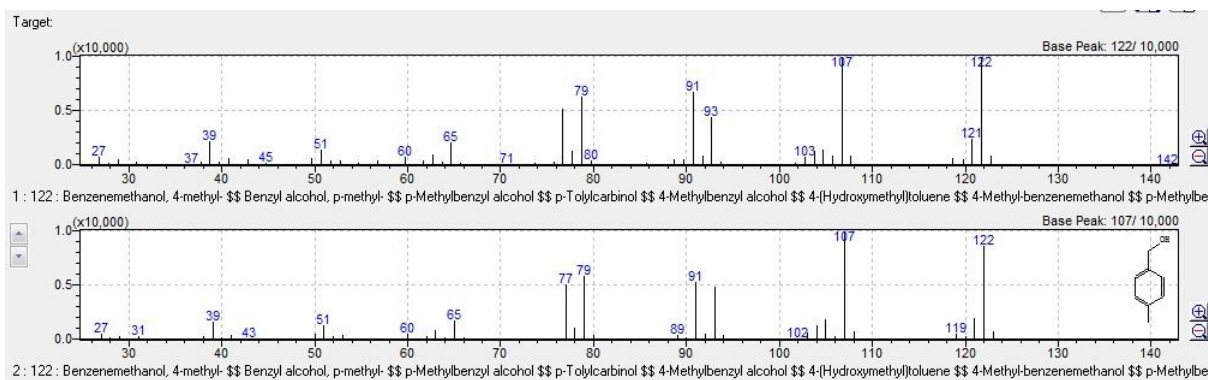

SI-Figure 24. GC-MS of 4-Methylbenzyl ethanol, a product of the organo-catalyzed 4-methyl benzyl aldehyde.



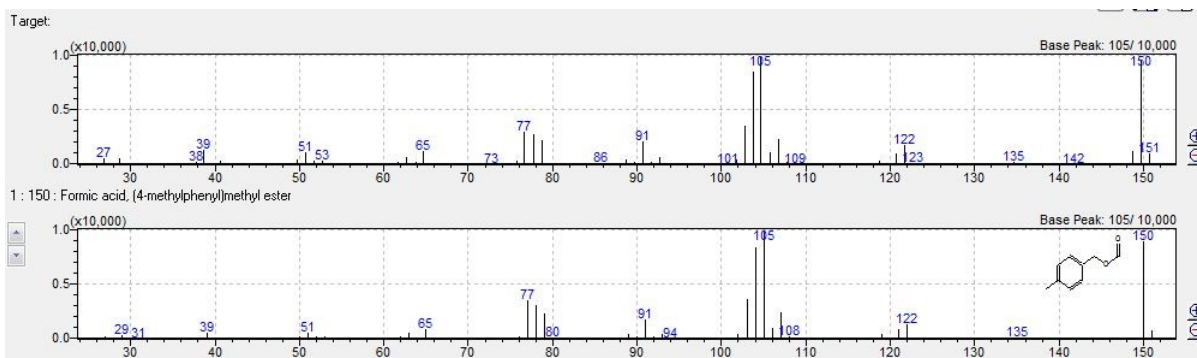

**SI-Figure 25.** GC-MS of 4-Methylbenzyl formate, a product of the organo-catalyzed 4-methyl benzyl aldehyde.

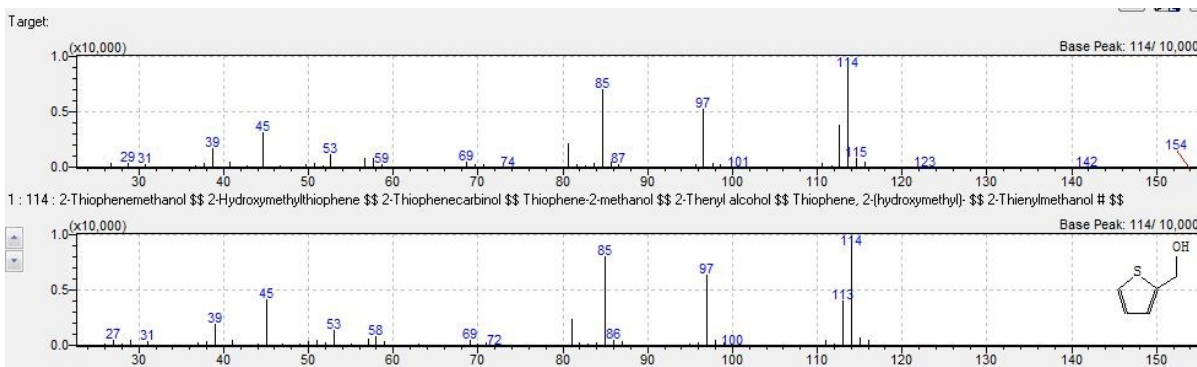

**SI-Figure 26.** GC-MS of 2-thiophene ethanol, a product of the organo-catalyzed thiophene-2-carboxaldehyde.

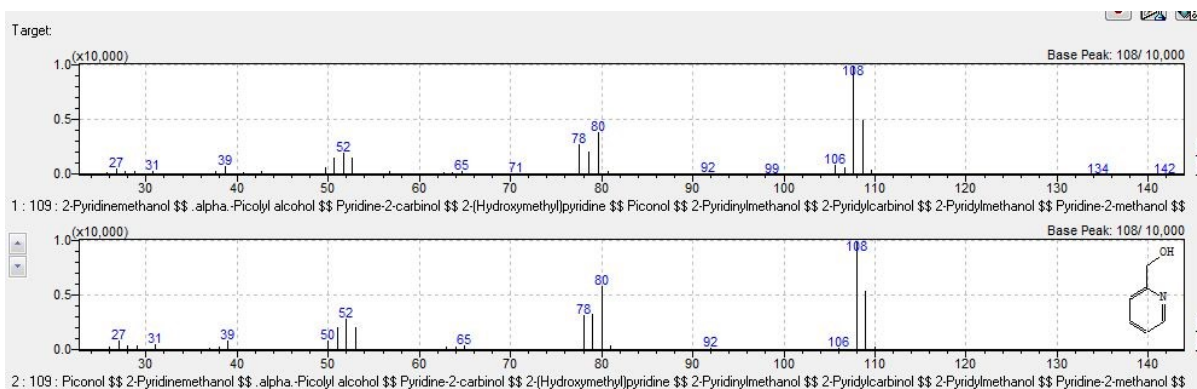

**SI-Figure 27.** GC-MS of 2-pyridyl ethanol, a product of the organo-catalyzed 2-pyridyl carboxaldehyde.

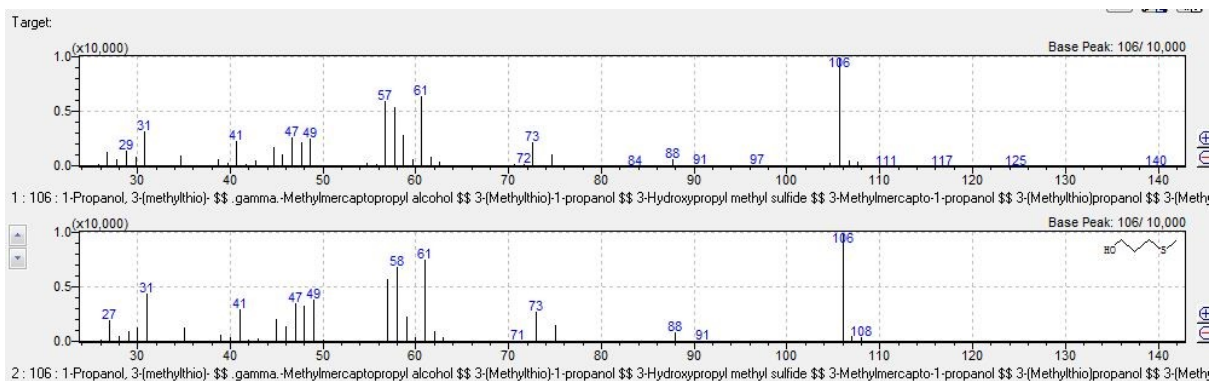

**SI-Figure 28.** GC-MS of 3-(Methylthio) propanol, a product of the organo-catalyzed 3-(methylthio) propionaldehyde.

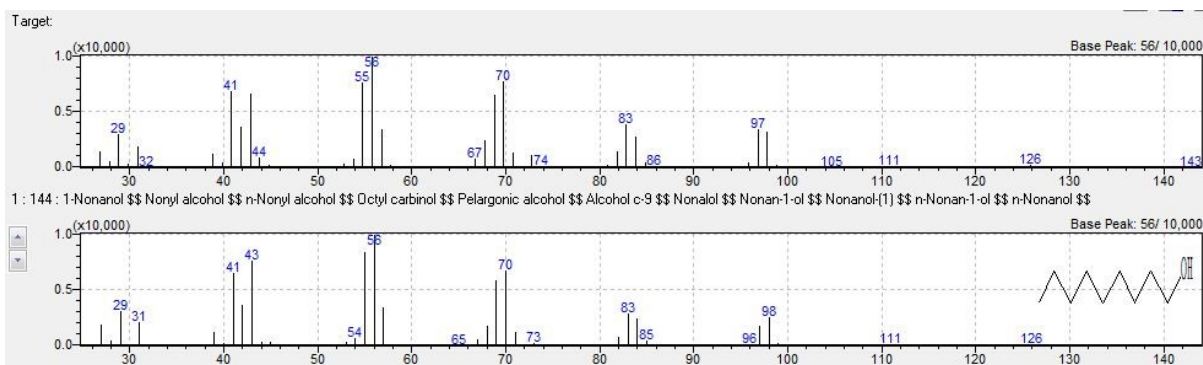

**SI-Figure 29.** GC-MS of Nonanol a product of the organo-catalyzed nonanal.
